## RETRACTION

# Retraction: Does financial innovation foster financial inclusion in Arab world? examining the nexus between financial innovation, FDI, remittances, trade openness, and gross capital formation

The *PLOS One* Editors

The *PLOS One* Editors retract this article [1] because it was identified as one of a series of submissions for which we have concerns about potential manipulation of the publication process, peer review integrity, and authorship. These concerns call into question the validity and provenance of the reported results. We regret that the issues were not identified prior to the article's publication.

The author did not agree with the retraction.

## Reference

1. Qamruzzaman M. RETRACTED: Does financial innovation foster financial inclusion in Arab world? Examining the nexus between financial innovation, FDI, remittances, trade openness, and gross capital formation. *PLoS One*. 2023;18(6):e0287475. <https://doi.org/10.1371/journal.pone.0287475> PMID: 37327215

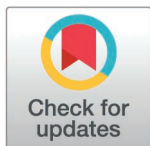

## OPEN ACCESS

**Citation:** The *PLOS One* Editors (2025) Retraction: Does financial innovation foster financial inclusion in Arab world? examining the nexus between financial innovation, FDI, remittances, trade openness, and gross capital formation. *PLoS One* 20(10): e0334772. <https://doi.org/10.1371/journal.pone.0334772>

**Published:** October 23, 2025

**Copyright:** © 2025 The *PLOS One* Editors. This is an open access article distributed under the terms of the [Creative Commons Attribution License](https://creativecommons.org/licenses/by/4.0/), which permits unrestricted use, distribution, and reproduction in any medium, provided the original author and source are credited.
